# Supplementary material for: Multi-peak single object emission of MAPbBr 3 nanoplatelets synthesised using a non-template ligand-assisted reprecipitation route
Source: Royal Society of Chemistry journal article supplement (doi:10.1039/d5nr04000k), 2026-01-01
Supplement: d5nr04000k1.pdf [file d5nr04000k1.pdf]

## Multi-peak single object emission of MAPbBr<sub>3</sub> nanoplatelets synthesised using a non-template ligand-assisted reprecipitation route

Suhaas Gupta<sup>1\*</sup>, Dmytro Vorontsov<sup>2</sup>, Anna Fučíková<sup>2</sup>, František Trojánek<sup>2</sup>, Dominika Zákutná<sup>3,4</sup>, Jozef Veselý<sup>5</sup>, Petr Harcuba<sup>5</sup>, Milan Dopita<sup>1</sup>

<sup>1</sup> Department of Condensed Matter Physics, Faculty of Mathematics and Physics, Charles University, Ke Karlovu 5, 12116 Prague 2, Czech Republic

<sup>2</sup> Department of Chemical Physics and Optics, Faculty of Mathematics and Physics, Charles University, Ke Karlovu 5, 12116 Prague 2, Czech Republic

<sup>3</sup> Department of Inorganic Chemistry, Faculty of Science, Charles University, Hlavova 2030/8, 12843 Prague 2, Czech Republic

<sup>4</sup> Institut Laue-Langevin – The European Neutron Source, 71 avenue des Martyrs, F-38042 Grenoble, France

<sup>5</sup> Department of Physics of Materials, Faculty of Mathematics and Physics, Charles University, Ke Karlovu 5, 12116 Prague 2, Czech Republic

\* Corresponding author's e-mail: suhaas96@gmail.com

### Supplementary Information

**Figure S1:** SAXS plot and Guinier-Porod function fit of the colloidal dispersion of the synthesised MAPbBr<sub>3</sub> NPLs

**Figure S2:** Time-resolved ensemble PL decay measurement of the reference toluene solvent and the synthesised MAPbBr<sub>3</sub> NPL colloidal dispersion fitted with a single-exponential decay curve

**Figure S3:** (a) and (b) SEM images of the synthesised MAPbBr<sub>3</sub> NPLs spin-coated onto a silica wafer captured with a middle in-lens detector for secondary electrons; (c) and (d) the same SEM images captured with an upper in-lens detector for surface sensitive SE. The images depict the well-isolated NPLs and their layered morphological features

**Figure S4:** (a) Spectral image of the sample captured on the camera, the vertical yellow box highlights the image of the slit, and the horizontal yellow box highlights the single peak emission spectrum of an individual MAPbBr<sub>3</sub> NPL; (b) Single peak emission spectrum integrated over 2 lines for a single MAPbBr<sub>3</sub> NPL marked in Figure S2(a) with a horizontal yellow box; (c) Frequency count histogram depicting the wavelength binning of the singular emission peaks observed from 61 individual MAPbBr<sub>3</sub> NPLs

**Figure S5:** (a) Spectral image of the sample captured on the camera, the vertical yellow box highlights the image of the slit, and the horizontal green boxes (top: light green, bottom: dark green) highlight the double peak emission spectra of 2 individual MAPbBr<sub>3</sub> NPLs; (b) Double peak emission spectra integrated over 2 lines for 2 single MAPbBr<sub>3</sub> NPLs marked in Figure

S3(a) with horizontal green boxes; **(c)** Frequency count histogram depicting the wavelength binning of the double emission peaks observed from 167 individual MAPbBr<sub>3</sub> NPLs

**Figure S6:** **(a)** Spectral image of the sample captured on the camera, the vertical blue box highlights the image of the slit, and the horizontal blue box highlights the triple peak emission spectrum of an individual MAPbBr<sub>3</sub> NPL; **(b)** Triple peak emission spectrum integrated over 3 lines for a single MAPbBr<sub>3</sub> NPL marked in Figure S4(a) with a horizontal yellow box; **(c)** Frequency count histogram depicting the wavelength binning of the triple emission peaks observed from 119 individual NPLs

**Figure S7:** **(a)** Spectral image of the sample captured on the camera, the vertical orange box highlights the image of the slit, and the horizontal orange box highlights the multi-peak emission spectrum of an individual MAPbBr<sub>3</sub> NPL; **(b)** Multi-peak emission spectrum integrated over 3 lines for a single MAPbBr<sub>3</sub> NPL marked in Figure S5(a) with a horizontal orange box; **(c)** Frequency count histogram depicting the wavelength binning of the multi-peak emission observed from 134 individual MAPbBr<sub>3</sub> NPLs

**Figure S8:** Frequency count histograms depicting the wavelength binning of the multi-peak PL emission observed from 481 individual MAPbBr<sub>3</sub> NPLs, separated by the number of emission peaks observed, i.e., single-, double-, triple- or multi-peak emission of a single particle. The peak counts are normalised against the number of emission peaks in the 440-450 nm wavelength bin for each histogram individually

**Figure S9:** Emission spectra integrated over the wafer area under the slit across 4 successive spectral image captures, i.e., emission spectra from 4 different populations of MAPbBr<sub>3</sub> NPLs that have been continuously laser irradiated for increasing time from the 1<sup>st</sup> to the 4<sup>th</sup> capture

**Figure S10:** AFM images obtained **(a)** 2 hours, **(c)** 48 hours, and **(e)** 430 hours after casting 0.8  $\mu$ L of synthesised MAPbBr<sub>3</sub> NPLs onto a mica substrate; **(b)**, **(d)**, and **(f)** are the size distribution histograms of the respective AFM images

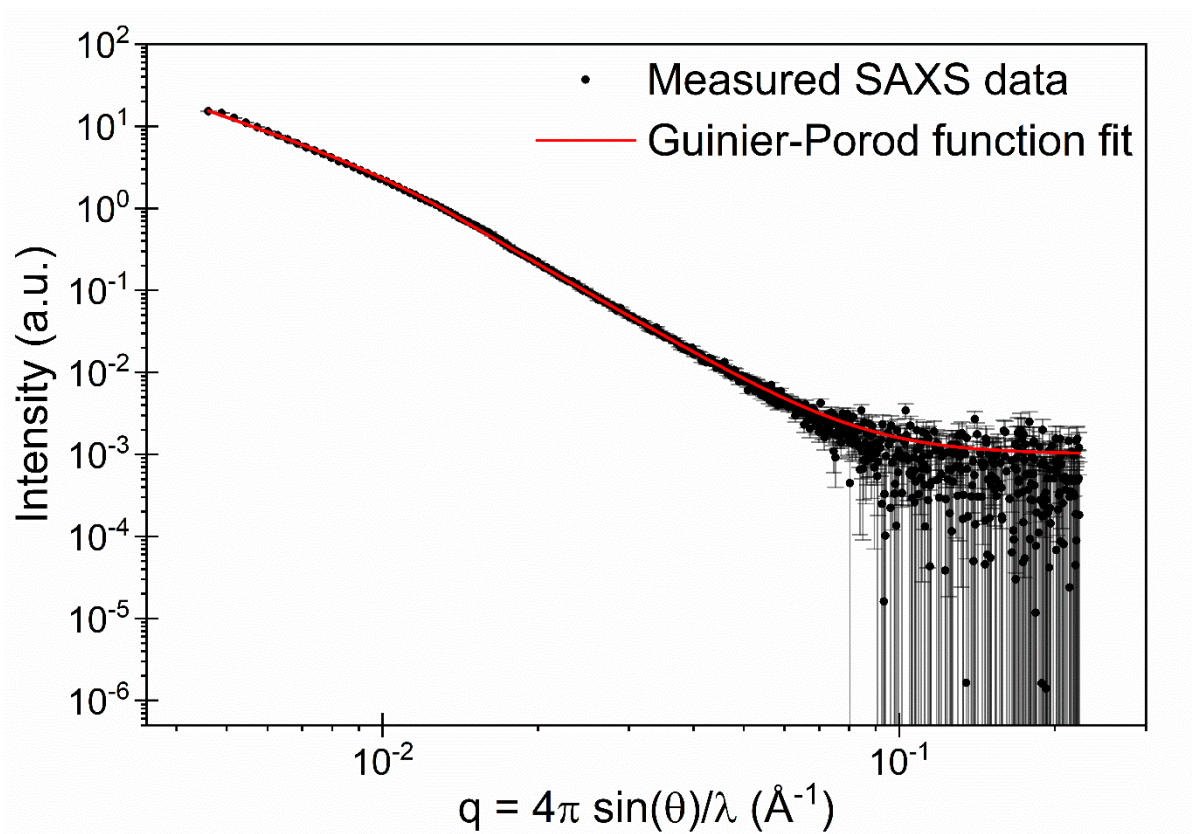

**Figure S1:** SAXS plot and Guinier-Porod function fit of the colloidal dispersion of the synthesised MAPbBr<sub>3</sub> NPLs

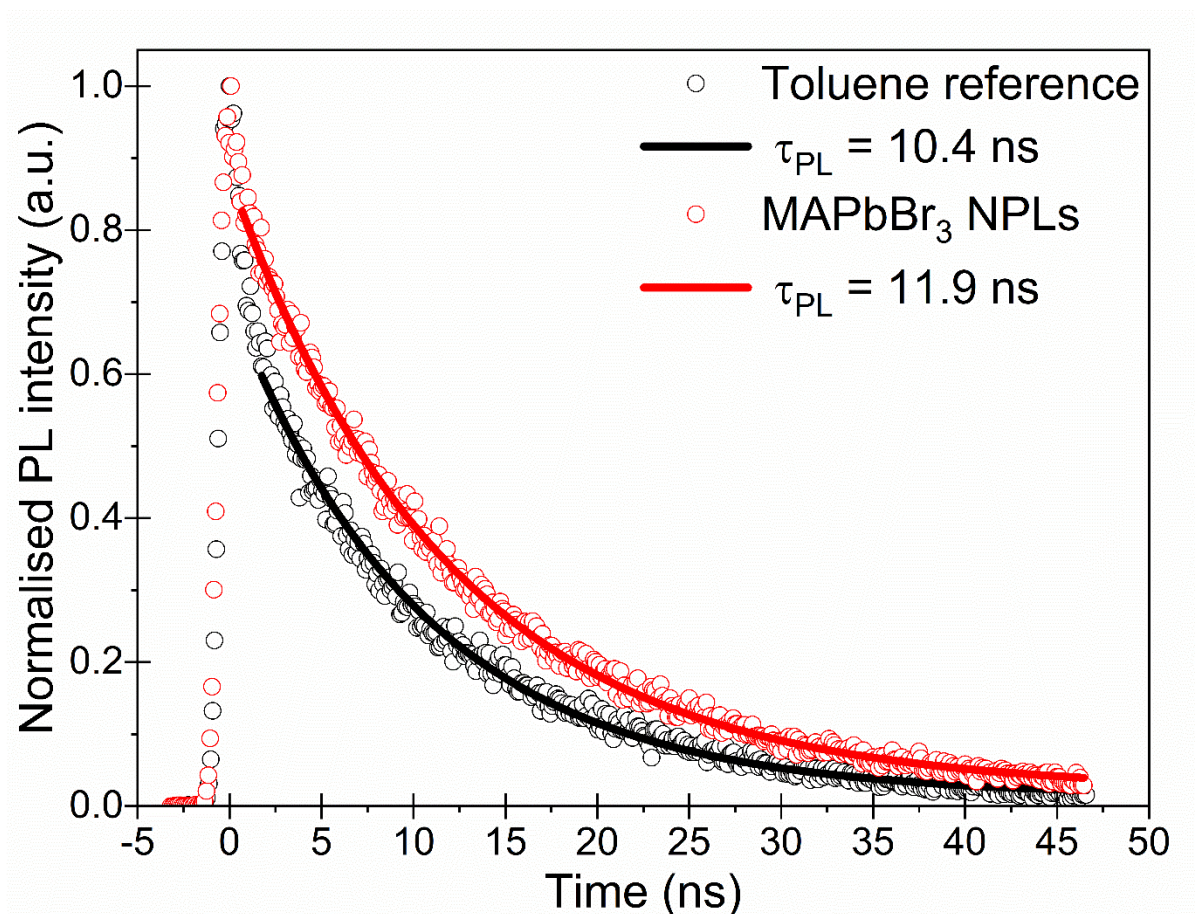

**Figure S2:** Time-resolved ensemble PL decay measurement of the reference toluene solvent and the synthesised MAPbBr<sub>3</sub> NPL colloidal dispersion fitted with a single-exponential decay curve

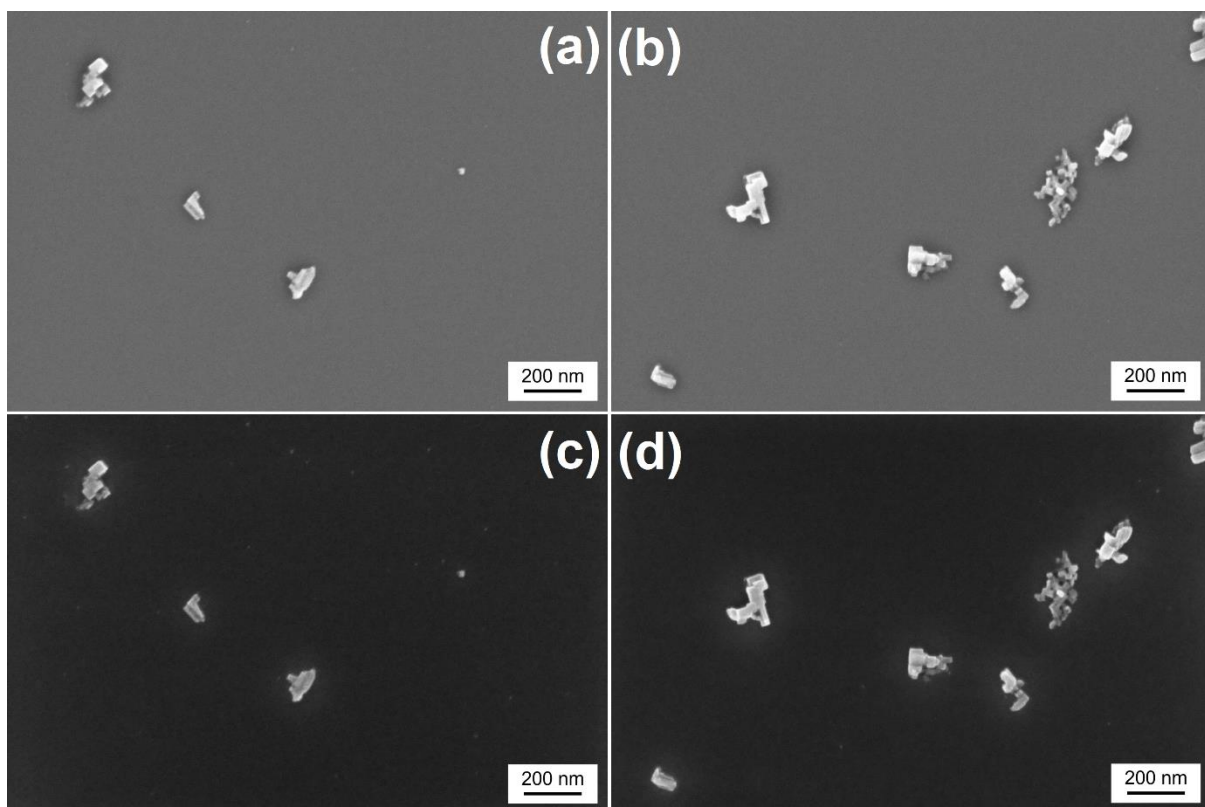

**Figure S3:** (a) and (b) SEM images of the synthesised MAPbBr<sub>3</sub> NPLs spin-coated onto a silica wafer captured with a middle in-lens detector for secondary electrons (SE); (c) and (d) the same SEM images captured with an upper in-lens detector for surface sensitive SE. The images depict the well-isolated NPLs and their layered morphological features

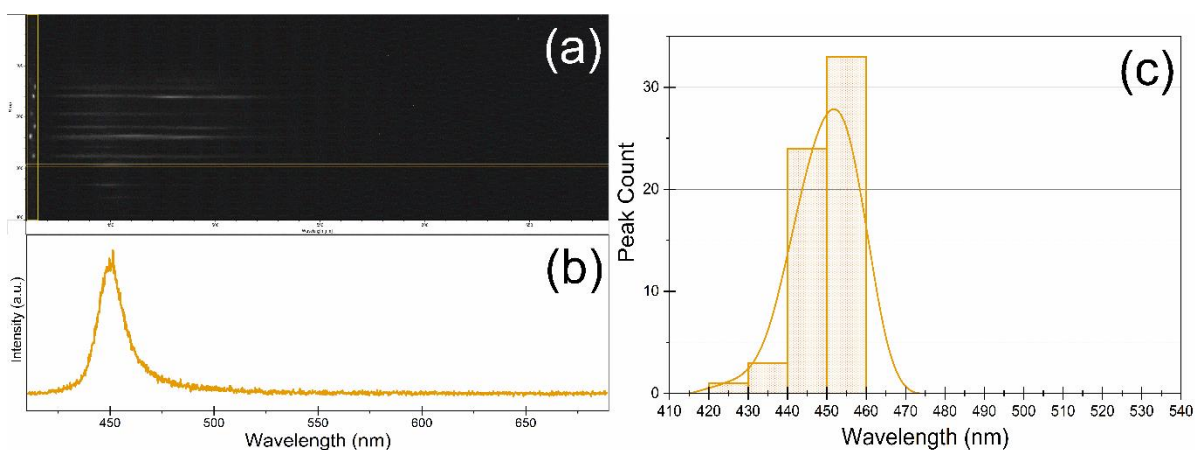

**Figure S4:** (a) Spectral image of the sample captured on the camera, the vertical yellow box highlights the image of the slit, and the horizontal yellow box highlights the single peak emission spectrum of an individual MAPbBr<sub>3</sub> NPL; (b) Single peak emission spectrum integrated over 2 lines for a single MAPbBr<sub>3</sub> NPL marked in Figure S2(a) with a horizontal



yellow box; **(c)** Frequency count histogram depicting the wavelength binning of the singular emission peaks observed from 61 individual MAPbBr<sub>3</sub> NPLs

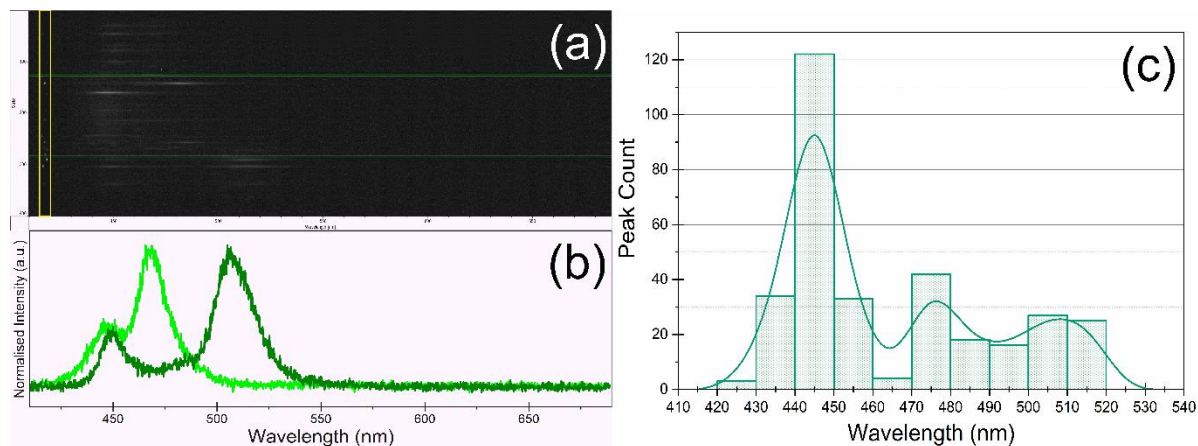

**Figure S5:** **(a)** Spectral image of the sample captured on the camera, the vertical yellow box highlights the image of the slit, and the horizontal green boxes (top: light green, bottom: dark green) highlight the double peak emission spectra of 2 individual MAPbBr<sub>3</sub> NPLs; **(b)** Double peak emission spectra integrated over 2 lines for 2 single MAPbBr<sub>3</sub> NPLs marked in Figure S3(a) with horizontal green boxes; **(c)** Frequency count histogram depicting the wavelength binning of the double emission peaks observed from 167 individual MAPbBr<sub>3</sub> NPLs

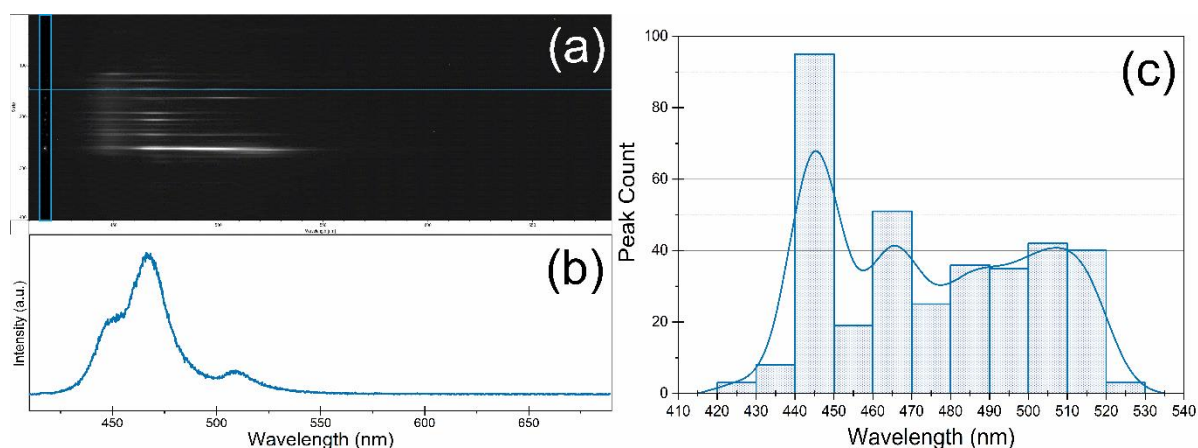

**Figure S6:** **(a)** Spectral image of the sample captured on the camera, the vertical blue box highlights the image of the slit, and the horizontal blue box highlights the triple peak emission spectrum of an individual MAPbBr<sub>3</sub> NPL; **(b)** Triple peak emission spectrum integrated over 3 lines for a single MAPbBr<sub>3</sub> NPL marked in Figure S4(a) with a horizontal yellow box; **(c)** Frequency count histogram depicting the wavelength binning of the triple emission peaks observed from 61 individual MAPbBr<sub>3</sub> NPLs

Frequency count histogram depicting the wavelength binning of the triple emission peaks observed from 119 individual NPLs

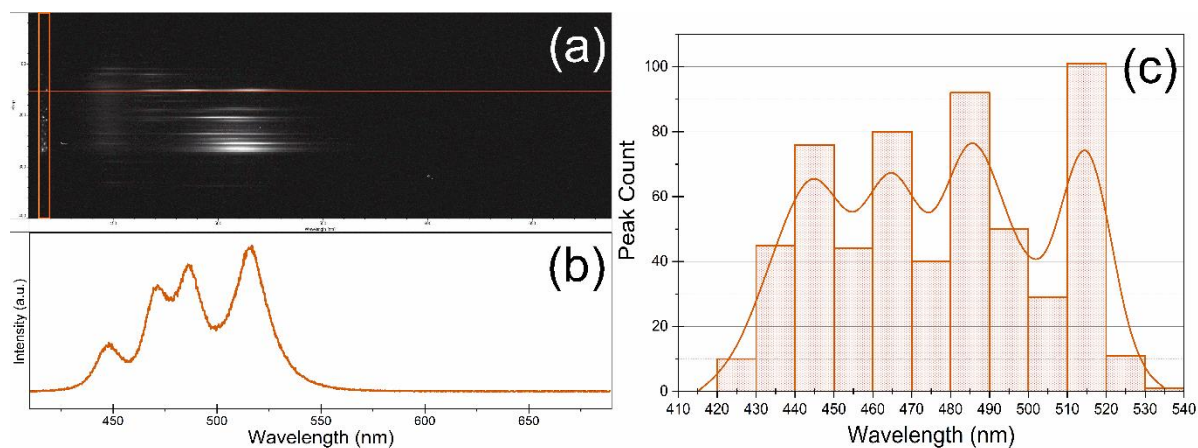

**Figure S7:** (a) Spectral image of the sample captured on the camera, the vertical orange box highlights the image of the slit, and the horizontal orange box highlights the multi-peak emission spectrum of an individual MAPbBr<sub>3</sub> NPL; (b) Multi-peak emission spectrum integrated over 3 lines for a single MAPbBr<sub>3</sub> NPL marked in Figure S5(a) with a horizontal orange box; (c) Frequency count histogram depicting the wavelength binning of the multi-peak emission observed from 134 individual MAPbBr<sub>3</sub> NPLs

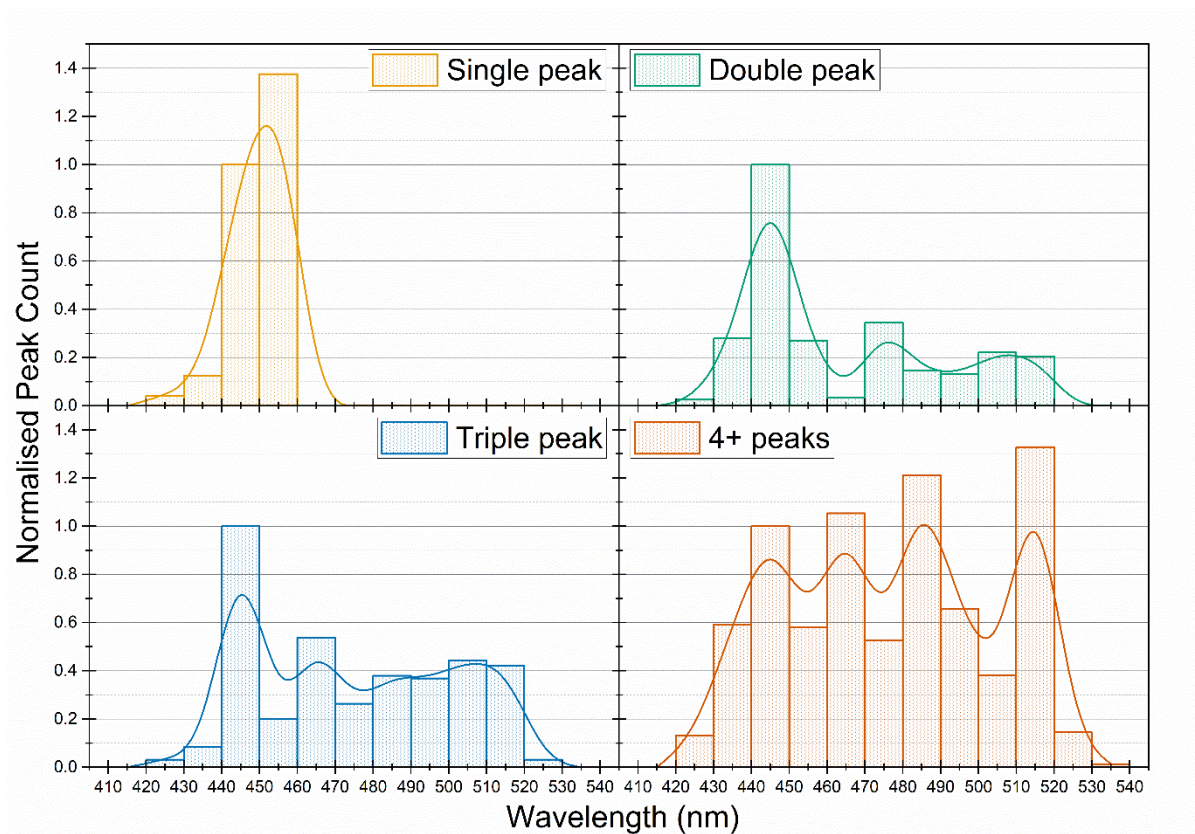

**Figure S8:** Frequency count histograms depicting the wavelength binning of the multi-peak PL emission observed from 481 individual MAPbBr<sub>3</sub> NPLs, separated by the number of emission peaks observed, i.e., single-, double-, triple- or multi-peak emission of a single particle. The peak counts are normalised against the number of emission peaks in the 440-450 nm wavelength bin for each histogram individually



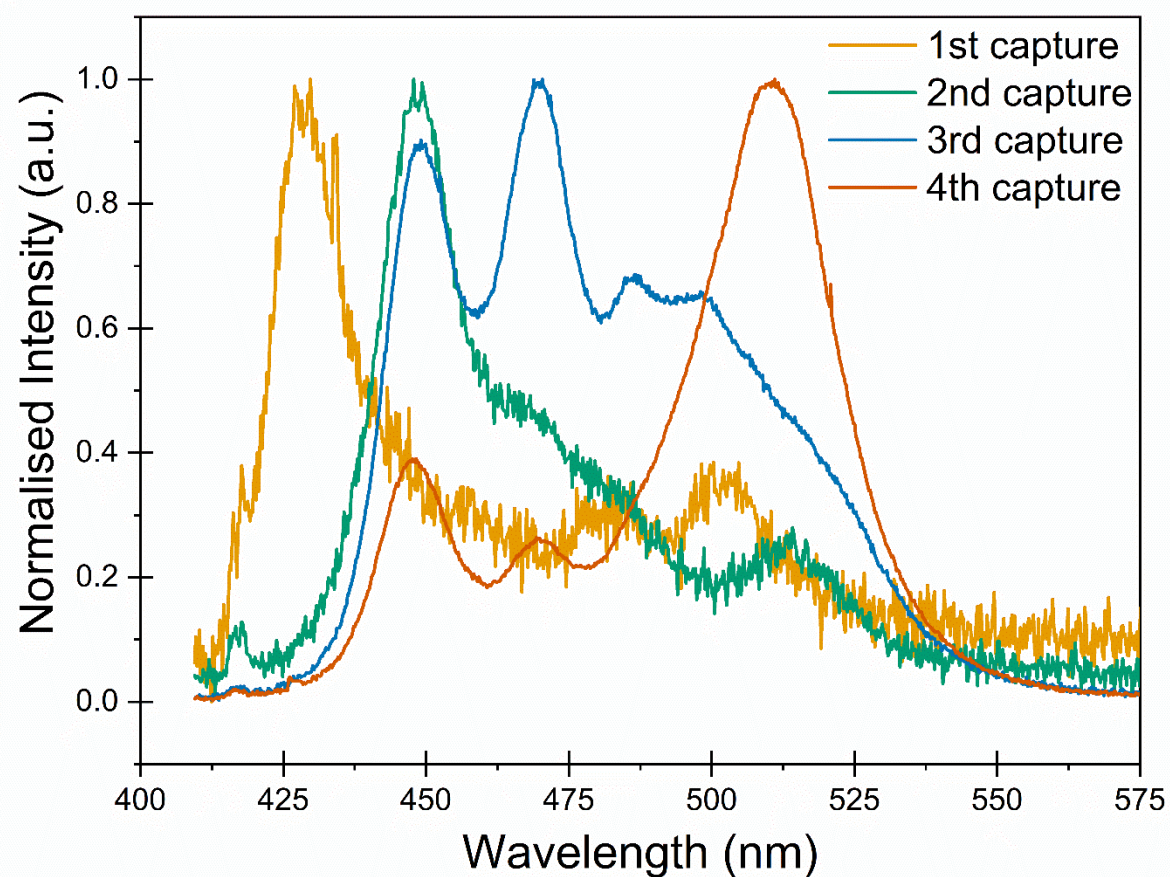

**Figure S9:** Emission spectra integrated over the wafer area under the slit across 4 successive spectral image captures, i.e., emission spectra from 4 different populations of MAPbBr<sub>3</sub> NPLs that have been continuously laser irradiated for increasing time from the 1<sup>st</sup> to the 4<sup>th</sup> capture

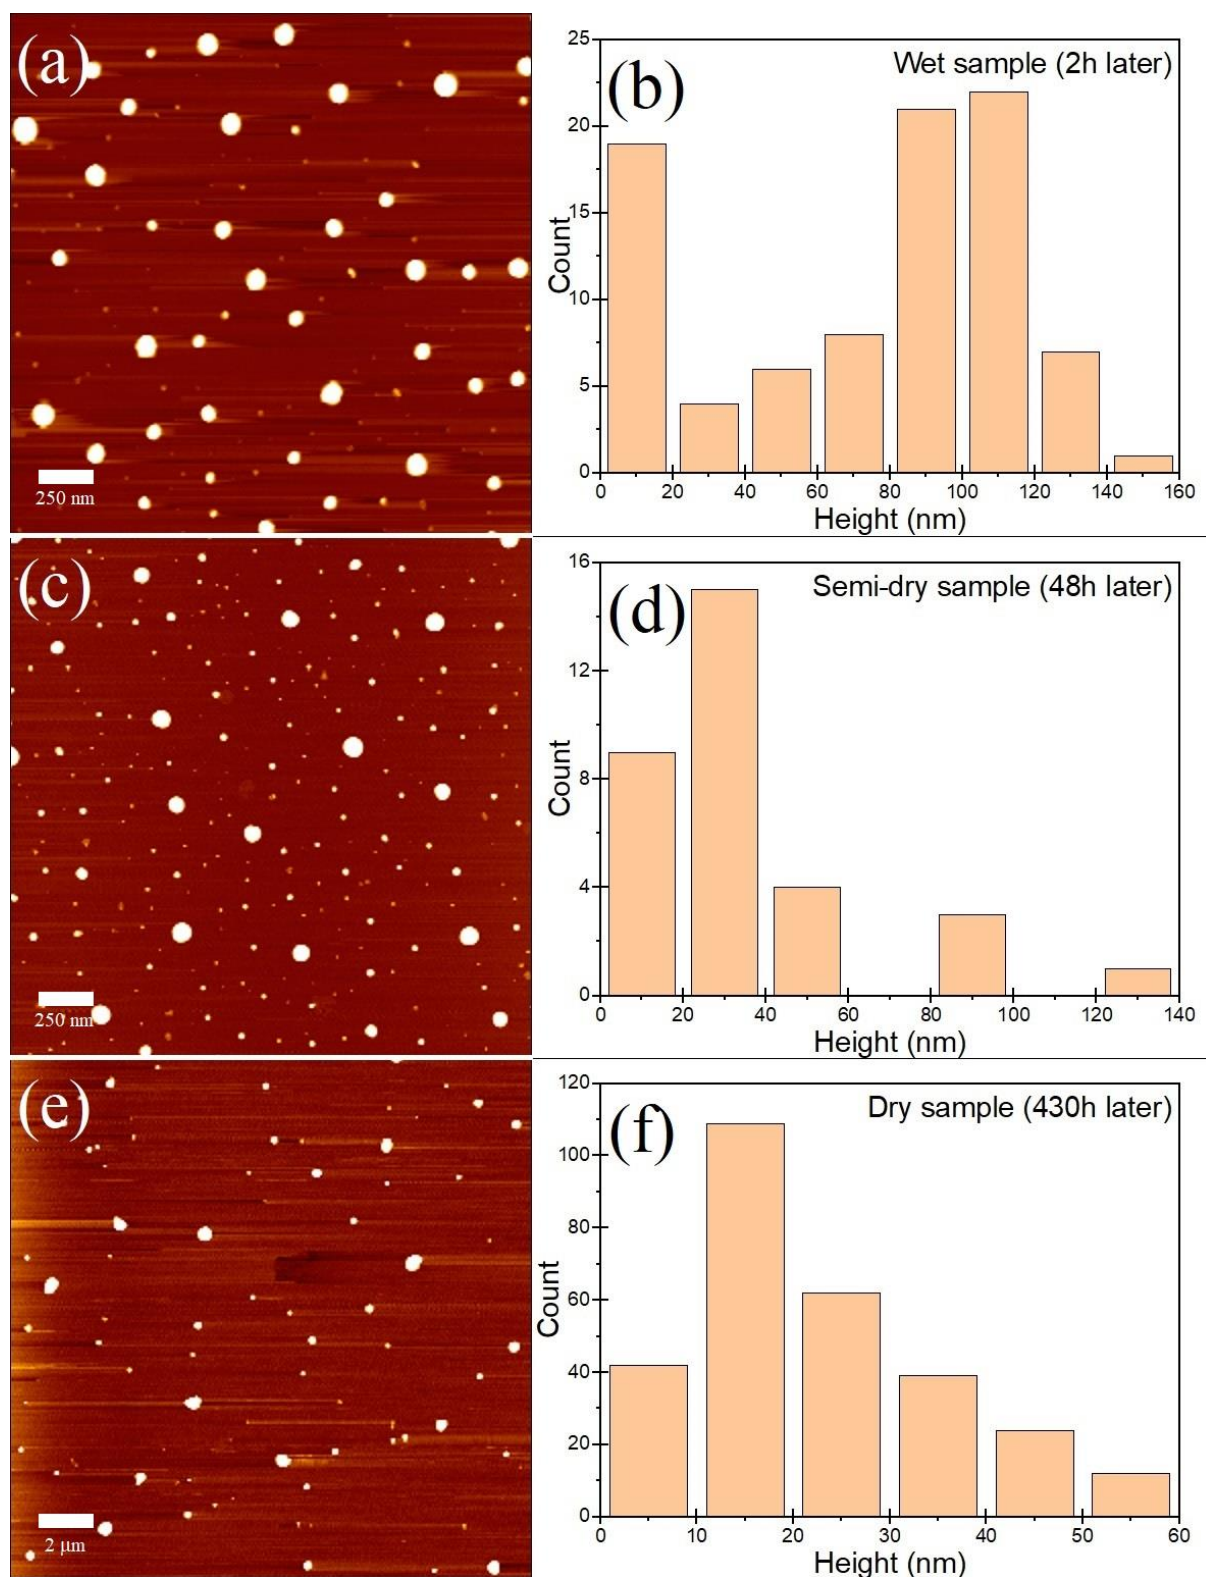

**Figure S10:** AFM images obtained (a) 2 hours, (c) 48 hours, and (e) 430 hours after casting 0.8 μL of synthesised MAPbBr<sub>3</sub> NPLs onto a mica substrate; (b), (d), and (f) are the size distribution histograms of the respective AFM images
